# 1     **Sensorimotor processing in the basal ganglia leads** 2     **to transient beta oscillations during behavior**

## 3     **Authors (ordered):**

4     Amin Mirzaei<sup>1,2</sup>, Arvind Kumar<sup>3,4</sup>, Daniel Leventhal<sup>5</sup>, Nicolas Mallet<sup>6</sup>, Ad Aertsen<sup>2,4</sup>, Joshua  
5     Berke<sup>7</sup>, Robert Schmidt<sup>8</sup>.

6     <sup>1</sup>BrainLinks-BrainTools, University of Freiburg, Freiburg, Germany.

7     <sup>2</sup>Faculty of Biology, University of Freiburg, Freiburg, Germany.

8     <sup>3</sup>Computational Biology, School of Computer Science and Communication, KTH Royal Institute  
9     of Technology, Stockholm, Sweden.

10    <sup>4</sup>Bernstein Center Freiburg, University of Freiburg, Freiburg, Germany.

11    <sup>5</sup>Department of Neurology, University of Michigan, Ann Arbor, MI 48109, United States.

12    <sup>6</sup>Universite de Bordeaux, Institut des Maladies Neurodegeneratives, 33076 Bordeaux, France.

13    <sup>7</sup>Department of Neurology and Kavli Institute for Fundamental Neuroscience, University of  
14    California San Francisco, USA.

15    <sup>8</sup>Department of Psychology, University of Sheffield, UK.

16    **Corresponding author:** Correspondence should be addressed to Amin Mirzaei, Faculty of  
17    Biology, University of Freiburg, Hansastrasse 9a, 79104 Freiburg, Germany.

18    Email: amin.mirzaei@brainlinks-braintools.uni-freiburg.de

19    **Number of pages:** 27

20    **Number of figures:** 8

21    **Number of words for Abstract:** 206

22    **Number of words for Introduction:** 658

23    **Number of words for Discussion:** 1845

## 24    **Acknowledgments:**

25    We thank Wei Wei, Alejandro Jimenez, Lars Hunger, and Mohammad Mohagheghi Nejad for  
26    useful comments and discussion. This work was supported by BrainLinks-BrainTools Cluster of  
27    Excellence funded by the German Research Foundation (DFG, grant number: EXC 1086) and the  
28    University of Sheffield.

## Abstract

Brief epochs of beta oscillations have been implicated in sensorimotor control in the basal ganglia of task-performing healthy animals. However, which neural processes underlie their generation and how they are affected by sensorimotor processing remains unclear. To determine the mechanisms underlying transient beta oscillations in the local field potential (LFP), we combined computational modeling of the subthalamo-pallidal network for the generation of beta oscillations with realistic stimulation patterns derived from single unit data. The single unit data were recorded from different basal ganglia subregions in rats performing a cued choice task. In the recordings we found distinct firing patterns in the striatum, globus pallidus and subthalamic nucleus related to sensory and motor events during the behavioral task. Using these firing patterns to generate realistic inputs to our network model lead to transient beta oscillations with the same time course as the rat LFP data. In addition, our model can account for further non-intuitive aspects of beta modulation, including beta phase resets following sensory cues and correlations with reaction time. Overall, our model can explain how the combination of temporally regulated sensory responses of the subthalamic nucleus, ramping activity of the subthalamic nucleus, and movement-related activity of the globus pallidus, leads to transient beta oscillations during behavior.

## Significance Statement

Transient beta oscillations emerge in the normal functioning cortico-basal ganglia loop during behavior. In this work we employ a unique approach connecting a computational model closely with experimental data. In this way we achieve a simulation environment for our model that mimics natural input patterns in awake behaving animals. Using this approach we demonstrate that a computational model for beta oscillations in Parkinson's disease can also account for complex patterns of transient beta oscillations in healthy animals. Therefore, we propose that transient beta oscillations in healthy animals share the same mechanism with pathological beta oscillations in Parkinson's disease. This important result connects functional and pathological roles of beta oscillations in the basal ganglia.

## Introduction

Exaggerated cortico-basal ganglia oscillations in the beta band (15 to 30 Hz) are a common feature of Parkinson's disease (PD; Brown et al., 2001; Hammond et al., 2007; Levy et al., 2002). However, beta oscillations are not always pathological. Brief epochs of beta oscillations have been implicated in sensorimotor control in the healthy basal ganglia (Berke et al., 2004; Leventhal et al., 2012; Courtemanche et al., 2003; Feingold et al., 2015). These studies indicate that temporally regulated transient beta oscillations are important for normal functioning of the motor system.

The origin of beta oscillations in the cortico-basal ganglia system remains unknown. However, interactions between subthalamic nucleus (STN) and globus pallidus externa (GPe) can generate beta oscillations as has been shown in experimental (Bevan et al., 2002; Tachibana et al., 2011) and computational (Terman et al., 2002; Kumar et al., 2011, Pavlides et al., 2015; Wei et al., 2015) studies. Anatomically, STN and GPe are densely and reciprocally inter-connected (Shink et al., 1996). STN cells excite neurons in GPe (Kitai and Kita, 1987), which in turn receive inhibitory

68 input from GPe (Smith et al., 1990; Parent and Hazrati, 1995). Such recurrent excitation-inhibition  
69 can generate oscillations (Plenz and Kitai, 1999; Brunel, 2000), which may then propagate to other  
70 regions in the cortico-basal ganglia loop.

71 Beta oscillations have been proposed to play a functional role in maintaining the status quo in  
72 the motor system (Engel and Fries, 2010; Gillbertson et al., 2005). This idea has been supported  
73 by increased cortical beta-band activity during maintenance of a static position (Baker et al.,  
74 1997), active suppression of movement initiation (Swann et al., 2009), and post-movement hold  
75 periods (Pfurtscheller et al., 1996). Accordingly, beta power decreases in the cortico-basal ganglia  
76 loop during movement preparation and execution (Sochurkova and Rektor, 2003; Pfurtscheller et  
77 al., 2003; Alegre et al., 2005; Kuhn et al., 2004). However, recent studies have indicated a more  
78 complex picture in which beta oscillations affect behavior through motor adaptation (Tan et al.,  
79 2014) and modulation of task performance (Feingold et al., 2015).

80 Supporting a more complex picture of beta oscillations, we provided evidence that basal ganglia  
81 beta oscillations are involved in sensorimotor processing and the utilization of cues for behavior  
82 (Leventhal et al., 2012). In particular, we found that beta power increases following the sensory  
83 cues and movement initiation depended on how fast the animals reacted to a sensory cue. For  
84 short reaction times, LFP beta emerged after movement initiation, whereas for long reaction times,  
85 two separate beta epochs occurred, one before and one after movement initiation. In addition  
86 to modulation of beta power, we also observed that beta phases were affected by task events  
87 differently. Sensory cues, but not movement initiation, lead to a short-latency phase reset in the  
88 beta band (Leventhal et al., 2012).

89 Understanding these complex dynamics of beta oscillations is important to identify the underlying  
90 mechanisms that generate beta oscillations in the cortico-basal ganglia system. Currently, it is  
91 unknown whether pathological beta oscillations in Parkinson’s disease share the same mechanisms  
92 with transient beta oscillations in healthy animals. If this is the case, computational models for  
93 beta oscillations should be able to account for the complex beta dynamics in both healthy and  
94 Parkinsonian animals. Recent network models of beta oscillations in Parkinson’s disease have em-  
95 phasized that besides structural changes (e.g. connection strengths), also changes in spiking activity  
96 of external inputs can promote beta oscillations (Kumar et al., 2011), which might drive transient  
97 beta oscillations. Here we exploit this property by directly using activity patterns recorded in  
98 healthy rats during task performance (Schmidt et al., 2013; Mallet et al., 2016) as input to our  
99 computational model to study the resulting impact on the beta dynamics. Employing this novel  
100 approach we find that our model can account for the complex beta dynamics in the healthy rat  
101 LFP. Our results support overlapping mechanisms for pathological and healthy beta oscillations  
102 and provide the basis for studying the functional role of beta oscillations in network models.

## 103 Results

104 To determine whether a computational model for pathological beta oscillations in the STN-  
105 GPe network (Kumar et al., 2011) can account for complex beta dynamics during behavior in  
106 healthy animals, we devised realistic stimulation patterns for the network model based on single  
107 unit recordings in rats performing a cued choice task (Schmidt et al., 2013; Mallet et al., 2016). At  
108 the beginning of each trial, the rat entered one of three center nose ports in an operant chamber  
109 (“Nose-in” event; Figures 1A, B). The rat was trained to then hold its position for a variable time

110 interval (“Holding time”; 500-1200 ms) until a Go cue instructed the rat to quickly move its head  
111 to the adjacent left or right side port (“Nose-out” event; Figures 1A, B). Correct performance of  
112 the task was rewarded with a sugar pellet. While the animals performed the task we recorded  
113 in the striatum, GPe and STN to determine activity patterns of single units during the time of  
114 the Go cue and during movement initiation. Then we used these activity patterns to construct  
115 realistic input patterns for our network model. The network model we use here is a large-scale  
116 spiking network model consisting STN and GPe populations with conductance based synapses  
117 (Kumar et al., 2011; see Methods). Stimulating the network model via the realistic stimulation  
118 patterns allowed us to compare the resulting oscillatory dynamics in the model with properties of  
119 oscillations in the rat LFPs.

120 *Brief, short-latency sensory responses in STN.* 27% (75/276) of STN units responded to the  
121 Go cue with an increase in firing rate (Figure 1C; shuffle test,  $p < 0.01$ ; see Methods). In line  
122 with our previous reports on a subset of the same data (Schmidt et al., 2013), this included units  
123 with a very short latency (around 10-30 ms), and responses of individual units were typically very  
124 brief (see Figure 1C, top panel). In addition, some units responded with a longer latency (around  
125 40-100 ms), so that the overall distribution of peak response latencies had a bimodal shape (Figure  
126 1D). To mimic this STN response pattern to salient sensory stimuli, we simulated the Go cue in  
127 our model simulations below by using brief excitatory pulses with the same latency distribution.  
128 These pulses were then used as input to 27% randomly chosen STN model neurons (“sensory”  
129 STN neurons) to match the fraction of responding STN units in our single unit data.

130 *Movement-related activity in striatum and GPe.* 30% (100/320) of putative medium spiny  
131 neurons (MSNs) in the striatum increased their activity during contralateral movements (Figure  
132 1E; see Methods; also see Schmidt et al., 2013). We focused here on contralateral movements  
133 as most neurons typically responded more during contralateral than ipsilateral movements (Gage  
134 et al., 2010; Schmidt et al., 2013). In GPe, 40% (61/149) of the units decreased their activity  
135 during contralateral movements (Figure 1F; shuffle test,  $p < 0.05$ ; see Methods), possibly reflecting  
136 input from indirect pathway MSNs. Therefore, we assumed in the network model that striato-  
137 pallidal inhibition drives the GPe firing rate decreases during movement. We implemented this by  
138 generating inhomogeneous Poisson spike trains with a rate modulation following the MSN firing  
139 pattern during movement (Figure 1E). These spike trains were then used as inhibitory inputs to  
140 40% of the network model GPe neurons (“motor” GPe neurons) to match the fraction of GPe units  
141 with movement-related firing rate decreases in the single unit data. Note that we restricted our  
142 analysis of GPe units to putative prototypical neurons (Mallet et al., 2016) because they receive  
143 input from MSNs and project to STN, while arkypallidal GPe neurons probably receive different  
144 inputs and do not project to STN (Mallet et al., 2012; Dodson et al., 2015).

145 *Ramping activity in STN and GPe while rats wait for the Go cue.* In addition to single unit  
146 responses that could be classified as sensory or motor, in STN and GPe we found many units  
147 which exhibited a firing pattern that resembled a “ramp”, a continuous change in firing rate.  
148 A ramping pattern was present in the activity of 80% (216/276) of the STN units with either  
149 significantly increasing (positive ramp) or decreasing (negative ramp) firing rate while the animal  
150 was waiting for the Go cue (Figures 2A, B). Among the 216 ramping STN units, 44% (96/216)  
151 showed positive ramps (Figure 2A), whereas 56% (120/216) showed negative ramps (Figure 2B).  
152 However, the mean firing rate increase for the positive ramp units was four times as high as the  
153 mean firing rate decrease for the negative ramp units (4 Hz increase vs. 1 Hz decrease; inset in  
154 Figure 2B, bottom). The positive ramp was also observed in the average firing rate of the whole

155 STN population starting 500 ms before the Go cue (data not shown). Functionally, these ramps  
156 may correspond to a brake signal, preventing premature movement initiation (Frank, 2006).

157 We found a similar pattern in the GPe with 71% (106/149) of the units exhibiting a significant  
158 ramping activity before the Go cue (Figures 2C, D). Among these, 47% (50/106) showed positive  
159 ramps (Figure 2C) and 52% showed negative ramps (Figure 2D). As for the STN units, on average,  
160 the amplitude of the positive ramp in GPe was four times as high as the amplitude of the negative  
161 ramp, resulting in a net positive ramp in the population activity (data not shown). One property of  
162 the positive ramp STN and GPe units was that in long reaction time trials their activity remained  
163 elevated after the Go cue (Figures 2A, C, bottom panels). This property played a key role for the  
164 beta dynamics in the model below.

165 Based on these ramping patterns in STN and GPe, we designed inputs to the model STN  
166 neurons that lead to similar activity ramps (see Methods). Due to the excitatory drive from STN  
167 to GPe, in the model the ramps in STN activity resulted in corresponding ramps in GPe.

168 *Sensorimotor model inputs modulate time course of beta oscillations.* As a previous modeling  
169 study demonstrated that excitatory input to STN or inhibitory input to GPe can induce transient  
170 beta oscillations (Kumar et al., 2011), we hypothesized that the sequence of ramp, Go cue and  
171 movement-related activity patterns (Figures 3A, B) accounts for the complex beta dynamics in  
172 the LFP (Leventhal et al., 2012). First, we reproduced the time course of beta power modulation  
173 during movement initiation (Leventhal et al., 2012) using an extended data set of GPe recordings  
174 (Schmidt et al., 2013; Mallet et al., 2016). In the rat LFPs beta power started to increase before  
175 the time of movement initiation and then showed a pronounced peak just after movement onset  
176 (Figure 3C, top). The time course of beta power in the network model exposed to our single-unit  
177 stimulation patterns (Figure 3B) matched the experimentally observed results (Figure 3C, bottom),  
178 including the pre-movement beta power increase, the pronounced beta peak during movement, and  
179 the second beta peak related to the movement out of the side port (see Methods). The network  
180 model beta time course was in this case determined by the STN ramping activity, combined  
181 with the sensory responses of the STN neurons and the striato-pallidal motor inputs (Figure 3B).  
182 This is an important result because it connects single unit activity during task performance with  
183 oscillatory network dynamics.

184 Here, we compared the experimental LFP data with the model population firing rate (Figure  
185 3C). However, the origin of the LFP and its relation to spiking activity are not well understood in  
186 the basal ganglia. It seems that the LFP mostly reflects synchronized postsynaptic currents (Nie-  
187 dermeyer and Lopez da Silva, 1998; Nunez and Srinivasan, 2005; Jensen et al., 2005; McCarthy et  
188 al., 2011). However, we found that the time course of beta oscillations was very similar, irrespec-  
189 tive of whether we used the population firing rate or the summation of inhibitory or excitatory  
190 postsynaptic currents to represent the experimental LFP data (data not shown). Therefore, to stay  
191 consistent with previous models (e.g. Kumar et al., 2011; Pavlides et al., 2015; Nevado-Holgado  
192 et al., 2014), we continue to use the population firing rate in the model to determine the presence  
193 of beta oscillations.

194 *Sensory responses in STN lead to a beta phase reset.* In addition to the described changes in  
195 beta power, the phases of beta oscillations can be modulated by specific events in the behavioral  
196 task. Sensory cues (like the auditory Go cue) that did not lead to a distinctive increase in beta  
197 power were nevertheless followed by a short-latency phase reset in the LFP (Leventhal et al.,

2012). By contrast, beta power increases during movement were not accompanied by a phase  
reset in the beta band (Leventhal et al., 2012). Here, we confirm this result for GPe recording  
sites using an extended data set (Figures 4A, E; Schmidt et al., 2013; Mallet et al., 2016). To  
determine which properties of the neural signal lead to a phase reset or to a power increase in the  
beta band, we calculated grand averages of raw LFP traces (Figure 4C). We found that briefly  
after the Go cue a single beta cycle was visible. This short oscillation was rather weak and could  
only be visible when looking at the mean of the LFP data over many trials (Figure 4C). This  
brief beta epoch was associated with beta phase reset in the LFP data, following the Go cue  
(Figure 4A). Interestingly, providing brief stimulation to the “sensory” STN neurons in the model  
leads to a brief low-amplitude beta oscillation, which also only became visible when inspecting  
the mean population firing rate over many stimulations (Figure 4D). Similar to the experimental  
data, “sensory” stimulation of the model STN leads to beta phase reset in the ongoing activity  
of the network model (Figure 4B). Therefore, we conclude that brief excitatory inputs to STN  
can induce weak and brief, phase-locked beta oscillations in the STN-GPe network, mimicking the  
experimentally observed results.

Beta elevation around the time of movement onset was not accompanied by a phase reset in  
both the rat LFP data and in the model (Figures 4E, F). It might seem counterintuitive that  
a strong stimulation leading to a clear increase in beta power, did not reset the phase, whereas  
a weaker stimulation did. However, STN neuronal responses to the Go cue are brief, compared  
to the longer movement-related increases in the activity of MSNs (Figures 1C-E). Therefore, we  
hypothesized that the duration of neural responses to sensory and motor events might be the key  
difference. To test this, we systematically varied the duration of the inputs to the model “sensory”  
STN neurons and “motor” GPe neurons (note that the inputs are inhomogeneous Poisson spike  
trains with firing rate patterns of a half cosine wave; see Methods). We found that for brief inputs  
(leading to brief changes in the neuronal activity) there was a phase reset in the ongoing activity  
of the network model (Figure 5). Longer stimulations of “motor” GPe neurons elevated the beta  
power without phase reset (Figures 5C, D). For stimulation durations longer than a single beta  
period in the model (i.e. about 50 ms), we only observed beta power elevation without phase  
reset (Figures 5C, D). In fact, the maximal phase reset in the network model occurred when  
the stimulation duration was 25 ms, equaling half the beta cycle (Figures 5B, D). For the short  
stimulation duration the time to get to the maximum of the half cosine firing rate pattern in short  
(i.e. the slope is larger). This effectively leads to no trial-to-trial variability because all realizations  
of the Poisson process with such a brief firing rate pattern are very similar (with respect to the  
spike times). This similarity in the input then leads to a similar response in the network model  
and therefore a phase reset across trials. In contrast, for longer stimulation the time to get to the  
maximum of the half cosine firing rate pattern is longer (with smaller slope). This leads to more  
trial-to-trial variability with respect to the spike times in the realization of the Poisson process.  
Correspondingly, this translates into trial-to-trial variability in the response of the network model  
to the long stimulation and therefore a random phase across trials.

Longer stimulations of the “sensory” STN neurons did not elevate the beta power in the network  
model (Figure 5A). This is because “sensory” STN units made up a smaller fraction (27%) of  
the STN population in our model compared to 40% “motor” GPe units (see above). The long  
stimulation of a small fraction of the STN neurons was not sufficient to bring the network model  
into the oscillatory state. In general, for a certain stimulation strength, the fraction of stimulated  
neurons in the network model is an effective parameter to determine the amount of evoked beta  
power (Kumar et al., 2011).

244 *Disentangling the complex relationship between reaction time and beta dynamics.* The time  
245 course of beta oscillations depends on how fast the animal initiates movement in response to the  
246 Go cue (Leventhal et al., 2012). For short reaction times, the mean LFP beta power shows a single  
247 peak after movement initiation. For long reaction times, the mean LFP beta power shows two  
248 peaks, with the first peak before and the second peak after movement initiation (see highlighted  
249 300 ms epochs preceding and following Nose Out in Figure 6A, right; see also Leventhal et al.,  
250 2012). The bimodal shape of the mean beta power for long reaction time trials is also visible when  
251 aligned to the Go cue (Figure 6A, left). A straightforward idea would be that the first peak of the  
252 mean beta power for long reaction time trials is mostly driven by the Go cue or, alternatively, by  
253 the upcoming movement. However, if the beta peak was driven by the Go cue, we would expect  
254 a higher peak for the data aligned to the Go cue than for the data aligned to movement onset.  
255 Accordingly, if the beta peak was related to the movement, we would instead expect a higher  
256 peak for the data aligned to the movement onset. In contrast, despite variability in reaction time,  
257 this peak had a similar shape and amplitude for both alignment to the Go cue and to movement  
258 onset. Therefore, this beta peak does not seem to be simply driven by a sensory or motor event.  
259 With the help of our network model, we disentangle the mechanisms underlying these reaction  
260 time-dependent complex features of beta.

261 Using our stimulation patterns based on single unit recordings, we studied how different reaction  
262 times affect the time course of beta power. We found a strikingly similar effect of reaction time  
263 on the time course of beta power in the network model (Figure 6B). For long reaction time trials  
264 the model exhibited two separate peaks in the mean beta power with the same time course as the  
265 experimental LFP data (Figure 6B). Furthermore, the peak of the mean beta power in the model  
266 after movement onset for short reaction time trials had a higher amplitude than in long reaction  
267 time trials, similar to the experimental LFP data (see right panels in Figures 6A and 6B). The  
268 ability of the model to capture the fine details of the complex beta power modulation became  
269 visible even at the single-trial level (Figures 6C, D). As in the experimental data, changes in mean  
270 power modulation were reflected as a change in the probability of a transient beta oscillation,  
271 rather than as only a gradual increase in the oscillation amplitude.

272 To understand the mechanisms underlying the complex relationship between beta and reaction  
273 times, we can now use our network model to determine the contribution of each stimulation  
274 component. Before the Go cue, ramping activity of the STN neurons in the model causes a  
275 gradual increase in beta power (mostly because of an increase in probability of beta), starting  
276 almost 600 ms before the Go cue (Figures 6B, D and Figure 7). At the time of the Go cue the  
277 sensory responses of the STN neurons generate a weak and brief beta oscillation in the model  
278 (green traces in Figure 7). In short reaction time trials this brief beta oscillation overlaps with  
279 beta oscillations driven by “ramp” and “motor” inputs (as sensory and motor events are temporally  
280 close). This overlap results in an interaction of ongoing beta (driven by “ramp” input) with beta  
281 driven by “motor” input, leading to high beta power around the time of movement onset (Figures  
282 6B and 7, top). For long reaction time trials, after the Go cue, but before movement initiation, the  
283 “sensory” and “ramp” inputs determine the beta dynamics in the model. The interaction between  
284 the “sensory” and “ramp” inputs leads to the first, high-amplitude beta peak for long reaction  
285 time trials (Figures 6B and 7, bottom). As Go cue and Nose Out events are temporally distant  
286 for long trials, this high-amplitude beta power starts to decay before the time of movement onset.  
287 This is followed by another beta epoch due to “motor” input which leads to the second peak of  
288 beta power, after the time of movement onset, for long reaction time trials (Figures 6B, D and

289 7). The amplitude of this second peak is smaller, compared to the peak after movement onset for  
290 short reaction time trials (Figure 6B, right), because it lacks the interaction with STN excitation  
291 due to the Go cue (Figure 7). Functionally, the first beta peak in long reaction time trials may be  
292 linked to the prolongation of movement initiation in high beta states (Levy et al., 2002; Brown et  
293 al., 2001; Chen et al., 2007; Pogosyan et al., 2009). Thereby our model connects “ramp” activity  
294 in STN with the generation of beta oscillations and potential functional roles as a “brake” (Frank,  
295 2006).

296 *Our results are robust to the STN-STN recurrent connectivity in the network model.* In the  
297 network model we used, the STN neurons received excitatory synaptic inputs from other STN  
298 neurons with a connection probability of 2% (Kumar et al., 2011). However, several experimental  
299 studies indicate that the STN-STN recurrent connectivity is very rare or do not exist (Hamond  
300 and Yelnik, 1983; Sato et al., 2000; Parent and Parent 2007; Koshimizu et al., 2013). Therefore,  
301 we modified the network model parameters to test if the model without STN-STN connections  
302 is also able to capture the behaviorally relevant dynamics of the LFP beta oscillations. Indeed,  
303 with slight modifications of parameters (see Methods), all key results, including the time course of  
304 beta around the time of movement preparation and execution (Figure 8A), the beta phase reset  
305 (Figures 8B, C), and the complex relationship between beta and reaction time (Figures 8D, E),  
306 were reproduced. This demonstrates that our model account of transient beta oscillations does  
307 not depend on STN-STN recurrent connectivity.

308 In summary, our results show that the combination of 1) sensory responses of STN neurons,  
309 2) movement-related inhibition of GPe neurons, and 3) ramping activity in STN, account for the  
310 complex properties of beta power modulation over time, beta phase reset and correlations with  
311 reaction time of rat electrophysiological recordings in the basal ganglia. Thereby, the model allows  
312 us to make clear predictions about the underlying mechanisms and provides the basis for studying  
313 functional consequences on neural processing and behavior.

## 314 Discussion

315 Oscillations in the LFP often reflect sensory, cognitive and motor aspects of neural processing,  
316 but can be difficult to interpret due to a lack of understanding how and why network oscillations  
317 emerge. Furthermore, we currently face a gap between firing patterns of single neurons and larger  
318 scale network dynamics. Here we addressed this by a combination of experimental data with  
319 computational modeling to study how firing patterns in single unit recordings of task-performing  
320 healthy rats affect basal ganglia network dynamics. Although our computational model was origi-  
321 nally used to describe beta oscillations in Parkinson’s disease, we found that this model can also  
322 account for many properties of beta oscillations in healthy animals. Thereby, we are able to char-  
323 acterize potential neuronal mechanisms underlying oscillations, relate healthy to pathological beta  
324 oscillations, and provide avenues for studying functional roles of beta oscillations in behavior.

### 325 Neuronal mechanisms of beta oscillations

326 Both computational and experimental studies have implicated the STN-GPe network in beta  
327 oscillations in Parkinson’s disease (Brown et al., 2001; Magill et al., 2001; Terman et al., 2002;  
328 Bevan et al., 2002; Rubin and Terman, 2004; Brown and Williams, 2005; Mallet et al., 2008a;



329 Tachibana et al., 2011; Stein and Bar-Gad, 2013; Nevado-Holgado et al., 2014; Pavlides et al.,  
330 2015; Wei et al., 2015). Moreover, it has been proposed that cortico-subthalamic excitation as well  
331 as striato-pallidal inhibition can generate beta oscillations in a network model of the subthalamo-  
332 pallidal loop (Gillis et al., 2002; Kumar et al., 2011; Nevado-Holgado et al., 2014; Pavlides et al.,  
333 2015; Wei et al., 2015; Ahn et al., 2016). In line with this we show that a combination of temporally  
334 regulated subthalamic excitation and pallidal inhibition reproduces the dynamics of transient beta  
335 oscillations observed in the healthy basal ganglia during behavior. Therefore, our findings support  
336 the idea that the same network that is responsible for beta oscillations in Parkinson's disease may  
337 also be involved in the generation of healthy beta oscillations in the basal ganglia.

338 Alternative to the STN-GPe network, also other mechanisms for the generation of beta oscillations  
339 have been proposed, including networks of striatal MSNs (McCarthy et al., 2011), feedback  
340 projections from GPe back to striatum (Corbit et al., 2016), or spread of cortical beta to STN.  
341 However, our model supports the role of the STN-GPe network in the generation of beta oscillations  
342 due to the close correspondence between single unit activity patterns and the resulting  
343 complex time course of beta oscillations. To what degree other models for the generation of beta  
344 would be able to account for the complex time course and behavioral correlates of beta remains  
345 to be shown. While increased striatal spiking increases beta oscillations in several models (Mc-  
346 Carthy et al., 2011; Kumar et al., 2011; Corbit et al., 2016), our model emphasizes in addition  
347 the role of excitatory inputs to STN for the transient dynamics of beta oscillations. Overall, as  
348 beta oscillations are a heterogeneous phenomenon with different frequency and behavioral corre-  
349 lates (Szurhaj et al., 2003; Kilavik et al., 2012; Feingold et al., 2015), it is likely that cortical and  
350 subcortical circuit contain several circuits and mechanisms for the generation of beta oscillations,  
351 e.g. to permit long range communication (Fries, 2005). Therefore, these different models are not  
352 necessarily exclusive and a key future challenge will be to disentangle the different circuits and  
353 their interaction. Nonetheless we have shown that the STN-GPe network is sufficient to explain  
354 many features of beta oscillations in awake behaving animals.

## 355 **Concurrent activation of direct and indirect MSNs during movement**

356 Activity of direct pathway MSNs (striato-nigral) promote actions while indirect pathway MSNs  
357 (striato-pallidal) suppress actions (Albin et al., 1989; Alexander and Crutcher, 1990; Kravitz et al.,  
358 2010; Freeze et al., 2013; Schmidt et al., 2013; Roseberry et al., 2016). However, here we considered  
359 movement-related increases in MSN activity (Figure 1E) as inhibitory input to the model GPe  
360 (Figures 3A, B), without knowing whether the recorded MSNs are part of the direct or indirect  
361 pathway. This model assumption is supported by evidence that direct and indirect pathway MSNs  
362 are concomitantly active during movement preparation and execution (Cui et al., 2013; Isomura et  
363 al., 2013). Nevertheless, there might be important activity differences between direct and indirect  
364 pathway neurons coordinating behavior. Whether co-activation of indirect pathway MSNs during  
365 movement reflects the suppression of alternative actions (Hikosaka et al., 2006; Redgrave et al.,  
366 2010) or is also important to activate specific neural assemblies in motor cortex (Oldenburg and  
367 Sabatini, 2015) remains unclear. Furthermore, almost 60% of direct pathway MSNs, possess  
368 collateral terminal fields in GPe (Cazorla et al., 2014). Therefore, it seems likely that during  
369 movements GPe receives increased inhibitory input from striatal MSNs as incorporated in the  
370 model.

## STN as a brake in the motor system

We found that many STN neurons exhibited a ramp in their firing rate while the animal was waiting for the Go cue. During this time it is essential for the animal not to initiate premature movements in order to receive the food reward (error trials were not rewarded). Building on previous models of STN providing a “hold-your-horses” signal (Frank, 2006), these ramps might prevent or delay the execution of movements. Correspondingly, in our experimental data the ramps reached a plateau after the Go cue, which was linked to the reaction time (i.e. the plateau persisted longer in trials with a long reaction time; Figure 2A, bottom). Therefore, these ramps might modulate the readiness for movement initiation exerted on downstream structures. However, we also observed (data not shown) that the population activity of the STN ramps did typically last until the time of movement initiation or even briefly longer, indicating that the offset of this STN ramp does not provide a motor command itself. Instead, high STN activity might ensure that only coordinated movement commands (potentially signaled by striatal output), but not premature movement impulses, lead to motor output.

Conceptually, our model provides an important link between putative “hold-your-horses” ramping activity in STN, beta oscillations and reaction times. The ramping activity (Figures 3A and 3B) increased spiking activity of the STN neurons and, consequently, lead to also more beta oscillations in the model (Kumar et al., 2011). This was key in accounting for the experimentally observed bimodal shape of the mean beta power for long reaction time trials in the model (more specifically, to generate the first peak of the mean beta power for long reaction time trials; Figure 6B).

The STN ramps might be due to cortical drive. For example, in the motor cortex of monkeys similar ramping activity has been observed while the animals anticipated sensory cues and needed to prevent premature movements (Confais et al., 2012). Furthermore, other cortical areas including right inferior frontal cortex and the pre-supplemental motor area project to STN and have been implicated in motor suppression (Wessel and Aron, 2017). In general, cortico-subthalamic excitation has previously been proposed to be important for the generation of beta oscillations (Tachibana et al., 2011; Pavlides et al., 2015). Importantly, the STN ramps during the hold period increased the probability of transient beta oscillations in our model. This fits well with anti-kinetic aspects of beta oscillations (Brown and Williams, 2005), and with STN activity correlating with slowness of movement observed during the progression of Parkinson’s disease (Bergman et al., 1994; Remple et al., 2011).

## Behavioral relevance and model predictions

Beta oscillations seem to comprise a heterogeneous phenomenon with potentially different functions and mechanisms depending on the brain region (Szurhaj et al., 2003; Kilavik et al., 2011; Feingold et al., 2015). Here we extend this view by proposing that transient, non-pathological basal ganglia beta oscillations can be driven by two distinct inputs. Firstly, beta oscillations can be driven by excitatory inputs to STN, including the ramping firing rate increases that might be linked to preventing premature movements (see above). Secondly, in the model, beta oscillations were also driven by increased striato-pallidal inhibition during movement. Therefore, our model provides an explanation for why beta oscillations in some cases can be “antikinetic” (Brown and Williams, 2005), but in other cases can also appear during movement (Leventhal et al., 2012).

413 Whether and how these two different modes of beta oscillations make functional contributions,  
414 e.g. by differential communication and signaling with other brain regions (Fries, 2005), is an open  
415 question.

416 Based on our model we make several experimentally testable predictions. Firstly, the two modes  
417 of beta generation, via inhibition of GPe and excitation of STN, might have different signatures  
418 in LFP recordings. If the beta oscillation is generated by striatal inhibition of GPe, the beta  
419 oscillation begins with a decrease in GPe activity. If the beta oscillation is generated by STN  
420 excitation (e.g. by cortical input), then the beta oscillation begins with an increase in STN and a  
421 subsequent increase in GPe activity. Although we do not know yet how spiking in the STN and  
422 GPe relates to patterns in the LFP, these two modes could e.g. translate into different onset phases  
423 of beta oscillations. Therefore, we presume that transient beta oscillations could be classified based  
424 on their onset phase, and that this is indicative of whether the oscillation was driven by input to  
425 GPe or STN. Despite practical challenges, such as detecting the exact onset phases of beta in noisy  
426 LFPs, this might provide valuable insights into whether the two modes of beta generation have  
427 distinct behavioral correlates.

428 Secondly, our model makes specific predictions about the relation between activity of MSNs  
429 projecting to GPe and the timing of beta oscillations (McCarthy et al., 2011). In recordings of  
430 identified direct and indirect pathway MSNs, our model predicts that the activity of the D2 MSNs  
431 predicts the timing of beta oscillations more accurately than the activity of the D1 MSNs. One  
432 complicating factor is that this distinction does not apply to beta oscillations driven by cortical  
433 excitation of STN.

434 Another model prediction arises from our observation that the duration of excitatory inputs to  
435 STN determines whether a phase reset occurs in the LFP or not. Sensory neuronal responses (like  
436 the auditory responses in STN; Figures 1C, D) are typically brief. We propose that sensory cues  
437 from other modalities have the same effect, so that e.g. visual cues that lead to brief excitations  
438 of STN also lead to a phase reset in the LFP signal. Furthermore, in addition to sensory cues,  
439 brief optogenetic stimulation of STN might yield the same effect. Whether these cue-induced beta  
440 phase resets play also a functional role, e.g. in the temporal coordination with inputs from other  
441 regions, remains to be shown.

442 Finally, we predict that changes in the structure of the STN ramping activity affects the prob-  
443 ability of beta oscillations. If the STN ramps indeed reflect a “hold your horses” signal (Frank,  
444 2006), changes in the behavioral paradigm that manipulate the readiness for movement initiation  
445 should directly affect the ramping activity. For example, if the cost for the animal of a premature  
446 response is increased, the corresponding ramping activity might change its time course and ampli-  
447 tude. In the model this would directly translate into changes in the time course and probability  
448 of transient beta oscillations.

449 In conclusion, the direct combination of our computational model with experimental data pro-  
450 vides a connection between single unit activity and network oscillations. This helps us to study the  
451 functional contributions of transient beta oscillation during sensorimotor processing in a behavioral  
452 context.

## Materials and methods

*Network model.* The basic model structure and the parameter settings are the same as in Kumar et al. (2011). Briefly, the model includes 1000 excitatory STN neurons, and 2000 inhibitory GPe neurons. Neurons were implemented as leaky-integrate-and-fire neurons. Synaptic input was modeled as transient exponential conductance changes. All model neurons receive uncorrelated Poisson spike trains as inputs so as to achieve previously reported baseline activities for STN (15 Hz) and for GPe (45 Hz; Bergman et al., 1994; Raz et al., 2000). All network simulations were written in python using pyNN as an interface to the simulation environment NEST (Gewaltig and Diesmann, 2007).

For the model variant without recurrent connections in STN (Figure 8), we used slightly different parameters for the connection probabilities, synaptic weights and transmission delays (Table 1). Furthermore, the background Poisson input to the model neurons was adjusted so that the neurons had a broader distribution of baseline firing rates that closer matched the firing rate distribution in the rat data (Schmidt et al., 2013; Mallet et al., 2016).

Table 1: Comparison of model parameters in Kumar et al. (2011) and the modified model without recurrent STN connections.

| Kumar et al., 2011     | Modified model         |
|------------------------|------------------------|
| $CP_{STN-STN} = 0.02$  | $CP_{STN-STN} = 0$     |
| $CP_{STN-GPe} = 0.02$  | $CP_{STN-GPe} = 0.022$ |
| $CP_{GPe-STN} = 0.02$  | $CP_{GPe-STN} = 0.035$ |
| $CP_{GPe-GPe} = 0.02$  | $CP_{GPe-GPe} = 0.02$  |
|                        |                        |
| $J_{STN-STN} = 1.2$    | $J_{STN-STN} = -$      |
| $J_{STN-GPe} = 1.2$    | $J_{STN-GPe} = 1.2$    |
| $J_{GPe-STN} = -1.135$ | $J_{GPe-STN} = -0.8$   |
| $J_{GPe-GPe} = -0.725$ | $J_{GPe-GPe} = -0.725$ |
|                        |                        |
| $d_{STN-STN} = 2$      | $d_{STN-STN} = -$      |
| $d_{STN-GPe} = 5$      | $d_{STN-GPe} = 6$      |
| $d_{GPe-STN} = 5$      | $d_{GPe-STN} = 6$      |
| $d_{GPe-GPe} = 2$      | $d_{GPe-GPe} = 3$      |

CP: Connection Probability, J: Synaptic weight, d: Delay (in ms)

*Electrophysiological data.* We combined previously recorded data sets of tetrode recordings in different basal ganglia subregions of rats performing a stop-signal task (for details see Leventhal et al., 2012; Schmidt et al., 2013; Mallet et al., 2016). In total we recorded 276 STN units from overall 44 recording sessions in 5 different rats, 149 putative prototypical GPe units from 41 recording sessions in 4 different rats, and 326 putative MSNs from 97 recording sessions in 9 different rats. Between two recording sessions tetrodes were typically moved by at least  $80\mu\text{m}$ , and we therefore considered units recorded in different sessions as different units. Animals performed

474 a stop-signal task, but here we only analyzed the subset of correct Go trials in which the animal  
475 moved contralateral to the recording site.

476 *Analysis and modeling of sensory and motor responses.* To identify STN neurons responding to  
477 the Go cue instructing contralateral movement (Figures 1C, D), we used a shuffle test to determine  
478 whether neural activity significantly increased within 150 ms after the Go cue. The time of each  
479 spike within -500 ms to +200 ms relative to the Go cue was changed to a random spike time  
480 within the same time window. Then we compared the number of actual spikes with the number of  
481 shuffled spikes in small time windows after the Go cue (15 non-overlapping 10 ms windows from  
482 0 to 150 ms after the Go cue). We repeated this procedure 10000 times and used the fraction of  
483 shuffles in which the number of shuffled spikes exceeded the number of actual spikes as the p-value  
484 to estimate statistical significance. STN neurons showing a p-value less than 0.01 for at least one  
485 bin after the time of the Go cue were considered as sensory responsive. We performed the same  
486 shuffling method on GPe neurons to select movement responsive GPe neurons (Figure 1F), using  
487 all spikes within -1s to +1s relative to movement onset to detect firing rate changes for 50 ms  
488 time windows from 0 to 250 ms after movement onset (i.e. 5 non-overlapping time bins). GPe  
489 neurons showing a p-value less than 0.05 for at least one bin after movement onset were considered  
490 as movement responsive.

491 To simulate sensory responses of STN neurons to the Go cue (Figures 1C, D), we used inho-  
492 mogeneous Poisson generators, each of which targeted one STN neuron in the model. The firing  
493 rate modulation of each inhomogeneous Poisson generator was a half sine wave with a duration of  
494 20 ms and maximum amplitude of 200 Hz. The latency of the sensory stimulation for each STN  
495 neuron in the model was considered as the time interval between the peak of the half sine wave  
496 and the time of the Go cue, which was taken randomly from the latency distribution of the sensory  
497 STN neurons in our experimental data (Figure 1D). Since in our single unit data 27% of the STN  
498 neurons responded to the Go cue, for each simulation we targeted 27% of randomly chosen STN  
499 neurons (as “sensory” STN neurons) in the network model.

500 Average firing rates of MSNs in our data were sorted based on their peak time within the interval  
501 from one second before to one second after movement initiation. MSNs with a peak firing rate  
502 between 150 ms before to 150 ms after movement onset were considered as movement-responsive  
503 MSNs ( $n = 100$ ; see Figure 1E). Firing rates of the movement-responsive MSNs were summed up  
504 and used as the firing rate pattern of an inhomogeneous Poisson generator representing striato-  
505 pallidal movement-related inhibition in the network model. Since 40% of the GPe neurons in our  
506 experimental data showed movement-related inhibition, for each simulation we targeted randomly  
507 chosen 40% of the GPe neurons (as “motor” GPe neurons) in the network model.

508 *Analysis and modeling of firing rate ramps.* To determine whether a recorded unit showed a  
509 ramping firing pattern, we computed the average firing rates of each unit from one subregion over  
510 trials with a 50 ms sliding time window moving in steps of 10 ms from 1 s before the time of Go cue  
511 to the time of Go cue. Each resulting average firing rate was then normalized to values between 0  
512 and 1 and then mean-subtracted before applying principal component analysis. First, we computed  
513 the corresponding covariance matrix of all normalized zero-mean firing rates. and then performed  
514 eigendecomposition on the covariance matrix using the  *eig*  function of MATLAB. The projection  
515  $p$  of each normalized zero-mean average firing rate  $r$  to the first eigenvector (corresponding to the  
516 maximum eigenvalue) was then computed as the normalized dot product:  $p_i = \langle r_i, v_1 \rangle / \lambda_1$ , where  $i$   
517 is the unit index and  $v_1$  the eigenvector with the largest eigenvalue  $\lambda_1$ . This yielded one projection

518 value  $p_i$  for each recorded unit. As the first eigenvector had a positive ramp over time, positive  
519 and negative projection values corresponded to positive and negative activity ramps of a recorded  
520 unit over time, respectively. The standard deviation of the projection distribution from a random  
521 covariance matrix is  $1/\sqrt{n}$  (Anderson, 2003), with  $n$  being the number of units. We considered  
522 neurons with a projection larger than  $2/\sqrt{n}$  or smaller than  $-2/\sqrt{n}$  as positive and negative ramp  
523 neurons, respectively (Figures 2A, B). This analysis method was applied to determine positive and  
524 negative ramps in GPe and STN.

525 To simulate the positive and negative ramps in the activity of the STN neurons observed before  
526 the Go cue (Figures 2A, B), for each simulation, we divided STN neurons in the network model  
527 into two non-overlapping subpopulations. The fraction of STN neurons in each subpopulation in  
528 the network model was similar to the fraction we obtained from our experimental data (i.e. 34%  
529 of neurons exhibited a positive ramp, 43% a negative ramp). We used an inhomogeneous Poisson  
530 generator with a positive ramp firing rate pattern as excitatory input to the positive ramp STN  
531 subpopulation in the model. The positive ramp in the firing rate of the inhomogeneous Poisson  
532 generator started 500 ms before the Go cue at 0 Hz and reached 250 Hz at the time of the Go  
533 cue and stayed constant until the movement onset (Figure 3B). Such a stimulation lead to a 4 Hz  
534 increase in the activity of the positive ramp STN subpopulation in the network model during the  
535 500 ms time interval preceding the Go cue, similar to what we observed in our experimental data  
536 (Figure 2A).

537 Similarly, to simulate the negative ramp in the activity of STN neurons, we used another  
538 inhomogeneous Poisson generator with a positive ramp firing rate pattern as inhibitory input to  
539 the negative ramp STN model neuron subpopulation. The positive ramp in the firing rate of the  
540 inhibitory inhomogeneous Poisson generator started 500 ms before the time of Go cue at 0 Hz and  
541 reached 350 Hz at the time of the Go cue and stayed constant until the movement onset. Such a  
542 stimulation pattern lead to a 1 Hz decrease in the activity of the negative ramp STN neurons in  
543 the network model during 500 ms time interval preceding the Go cue, similar to what we observed  
544 in our experimental data (Figure 2B).

545 *Time-frequency analysis.* The power spectrogram was computed by convolving the GPe popu-  
546 lation firing rate in the model with a standard Morlet wavelet ( $\sigma = 0.849/f$ ) of integer frequencies  
547 ( $f = 1$  to  $500$  Hz), and taking the logarithm of the squared magnitude of the resulting time  
548 series. To generate Figure 3C, bottom, we computed the mean spectrogram across 400 simulations  
549 of the model. The same method was used for GPe LFP data to generate Figure 3C, top. For each  
550 time point in the spectrogram, we summed the power in the beta range (15 to 30 Hz) and divided  
551 it by the summed power across all frequencies (1 to 500 Hz) to obtain continuous relative beta  
552 power, shown in Figures 4A, 4B, 4E, 4F, and 6B.

553 *Mean resultant length.* The GPe population firing rate in the network model was convolved with  
554 the standard Morlet wavelet of each integer frequency in the beta band (15 to 30 Hz). For each  
555 frequency, the Hilbert transform of the filtered signal was computed to obtain a phase over time.  
556 The phase spread for each time point was then calculated by computing the length of the mean  
557 resultant vector over all trials using  $MRL(t) = \frac{1}{n} \sum_n e^{i\theta(n,t)}$ , where  $\theta(n,t)$  is the phase of the  $n$ th  
558 trial at time  $t$  ( $n = 400$  for the model). This results in a continuous measure of phase spread for  
559 each frequency in the beta range. The mean resultant lengths shown in Figure 4 were computed  
560 by taking the average across all beta frequencies.

## References

- 561
- 562 Ahn S, Zuber SE, Worth RM, and Rubchinsky LL (2016) Synchronized Beta-Band Oscillations  
563 in a Model of the Globus Pallidus-Subthalamic Nucleus Network under External Input. *Front*  
564 *Comput Neurosci* 10:134.
- 565 Albin RL, Young AB, and Penney JB (1989) The functional anatomy of basal ganglia disorders.  
566 *Trends Neurosci* 12:366-375.
- 567 Alegre M, Alonso-Frech F, Rodriguez-Oroz MC, Guridi J, Zamarbide I, Valencia, M, Manrique  
568 M, Obeso JA, and Artieda J (2005) Movement-related changes in oscillatory activity in the human  
569 subthalamic nucleus: ipsilateral vs. contralateral movements. *Eur J Neurosci.* 22:2315-2324.
- 570 Alexander GE, Crutcher MD (1990) Functional architecture of basal ganglia circuits: neural  
571 substrates of parallel processing. *Trends Neurosci* 13:266-271.
- 572 Anderson TW (2003) *An Introduction to Multivariate Statistical Analysis*, 3rd Edition. Wiley  
573 and Sons, New York, NY.
- 574 Baker SN, Olivier E, and Lemon RN (1997) Coherent oscillations in monkey motor cortex and  
575 hand muscle EMG show task-dependent modulation. *J Physiol* 501:225-241.
- 576 Bergman H, Wichmann T, Karmon B, and DeLong MR (1994) The primate subthalamic nu-  
577 cleus. II. Neuronal activity in the MPTP model of parkinsonism. *J Neurophysiol* 72:507-520.
- 578 Berke JD, Okatan M, Skurski J, Eichenbaum HB (2004) Oscillatory entrainment of striatal  
579 neurons in freely moving rats. *Neuron* 43:883-896.
- 580 Bevan MD, Bolam JP, Crossman AR (1994) Convergent synaptic input from the neostriatum  
581 and the subthalamus onto identified nigrothalamic neurons in the rat. *Eur J Neurosci* 6:320-334.
- 582 Bevan MD, Magill PJ, Terman D, Bolam JP, Wilson CJ (2002) Move to the rhythm: oscillations  
583 in the subthalamic nucleus-external globus pallidus network. *Trends Neurosci* 25:525-31.
- 584 Bishop GH (1936) The interpretation of cortical potentials. *Cold Spring Harbor Symp. Quant.*  
585 *Biol* 4:305-319.
- 586 Brown P, Oliviero A, Mazzone P, Insola A, Tonali P, and Di Lazzaro V (2001) Dopamine  
587 dependency of oscillations between subthalamic nucleus and pallidum in Parkinson's disease. *J*  
588 *Neurosci* 21:1033-1038.
- 589 Brown P (2007) Abnormal oscillatory synchronisation in the motor system leads to impaired  
590 movement. *Curr Opin Neurobiol* 17:656-664.
- 591 Brown P, Williams D (2005) Basal ganglia local field potential activity: character and functional  
592 significance in the human. *Clin Neurophysiol* 116:2510-2519
- 593 Brunel N (2000). Dynamics of sparsely connected networks of excitatory and inhibitory spiking  
594 neurons. *J Comput Neurosci* 8:183-208.
- 595 Cassidy M, Mazzone P, Oliviero A, Insola A, Tonali P, Di Lazzaro V, Brown P (2002) Move-  
596 ment-related changes in synchronization in the human basal ganglia. *Brain* 125:1235-1246.
- 597 Cazorla M, De Carvalho FD, Chohan MO, Shegda M, Chuhma N, Rayport S, Ahmari SE,  
598 Moore H, Kellendonk C (2014) Dopamine D2 receptors regulate the anatomical and functional  
599 balance of basal ganglia circuitry. *Neuron* 81:153-164.
- 600 Chen CC, Litvak V, Gilbertson T, Kuhn A, Lu CS, Lee ST, Tsai CH, Tisch S, Limousin P,  
601 Hariz M, and Brown P (2007) Excessive synchronization of basal ganglia neurons at 20 Hz slows  
602 movement in Parkinsons disease. *Exp Neurol* 205:214-221.
- 603 Confais J, Kilavik BE, Ponce-Alvarez A, Riehle A (2012) On the Anticipatory Precue Activity  
604 in Motor Cortex. *J Neurosci* 32:15359-15368.
- 605 Corbit VL, Whalen TC, Zitelli KT, Crilly SY, Rubin JE, Gittis AH (2016) Pallidostriatal Pro-  
606 jections Promote  $\beta$  Oscillations in a Dopamine-Depleted Biophysical Network Model. *J Neurosci*  
607 36:5556-5571.

608 Courtemanche R, Fujii N, Graybiel AM (2003) Synchronous, focally modulated beta-band os-  
609 cillations characterize local field potential activity in the striatum of awake behaving monkeys. *J*  
610 *Neurosci* 23:11741-11752.

611 Creutzfeldt O, Watanabe S, Lux HD (1966a) Relation between EEG phenomena and potentials  
612 of single cortical cells. I. Evoked responses after thalamic and epicortical stimulation. *Electroen-*  
613 *cephalogr Clin Neurophysiol* 20:1-18.

614 Creutzfeldt O, Watanabe S, Lux HD (1966b) Relation between EEG phenomena and poten-  
615 tials of single cortical cells. II. Spontaneous and convulsoid activity. *Electroencephalogr Clin*  
616 *Neurophysiol* 20:19-37.

617 Cui G, Jun SB, Jin X, Pham MD, Vogel SS, Lovinger DM, and Costa RM (2013) Concurrent  
618 activation of striatal direct and indirect pathways during action initiation. *Nature* 494:238-242.

619 Delong MR (1990) Primate models of movement disorders of basal ganglia origin. *Trends*  
620 *Neurosci* 13:281-285.

621 Dodson PD, Larvin JT, Duffell JM, Garas FN, Doig NM, Kessar N, Duguid IC, Bogacz R,  
622 Butt SJ, Magill PJ (2015) Distinct developmental origins manifest in the specialized encoding of  
623 movement by adult neurons of the external globus pallidus. *Neuron* 86:501-513.

624 Eccles JC (1951) Interpretation of action potentials evoked in the cerebral cortex. *J Neuro-*  
625 *physiol* 3:339-464.

626 Engel AK, Fries P (2010) Beta-band oscillations: signalling the status quo? *Curr Opin Neurobiol*  
627 20:156-165.

628 Feingold J, Gibson DJ, DePasquale B, Graybiel AM (2015) Bursts of beta oscillation differenti-  
629 ate postperformance activity in the striatum and motor cortex of monkeys performing movement  
630 tasks. *PNAS* 112:13687-13692.

631 Frank MJ (2006) Hold your horses: a dynamic computational role for the subthalamic nucleus  
632 in decision making. *Neural Netw* 19:1120-1136.

633 Fries P (2005) A mechanism for cognitive dynamics: neuronal communication through neuronal  
634 coherence. *Trends Cogn Sci* 9:474-480

635 Freeze BS, Kravitz AV, Hammack N, Berke JD, Kreitzer AC (2013) Control of basal ganglia  
636 output by direct and indirect pathway projection neurons. *J Neurosci* 33:18531-18539.

637 Gage GJ, Stoetzner CR, Wiltschko AB, and Berke JD (2010) Selective activation of striatal  
638 fast-spiking interneurons during choice execution. *Neuron* 67:466-479.

639 Gewaltig M-O, Diesmann M (2007) NEST (Neural Simulation Tool) *Scholarpedia* 2(4):1430.

640 Gillis A, Willshaw D, Li Z (2002) Subthalamic-pallidal interactions are critical in determining  
641 normal and abnormal functioning of the basal ganglia. *Proc Biol Sci* 269:545-551.

642 Gillbertson T, Lalo E, Doyle L, Di Lazzaro V, Cioni B, and Brown P (2005) Existing motor  
643 state is favored at the expenses of new movement during 13-35 Hz oscillatory synchrony in the  
644 human corticospinal system. *J Neurosci* 25:7771-7779.

645 Hammond C, Bergman H, and Brown P (2007) Pathological synchronization in Parkinson's  
646 disease: networks, models and treatments. *Trends Neurosci* 30:357-366.

647 Hammond C, and Yelnik J (1983) Intracellular labelling of rat subthalamic neurones with  
648 horseradish peroxidase: computer analysis of dendrites and characterization of axon arborization.  
649 *Neuroscience* 8:781-790.

650 Hikoska O, Nakamura K, Nakamuran H (2006) Basal ganglia orient eyes to reward. *J Neuro-*  
651 *physiol* 95:567-584.

652 Isomura Y, Takekawa T, Harukuni R, Handa T, Aizawa H, Takada M, and Fuki T (1023)  
653 Reward-modulated motor information in identified striatum neurons. *J Neurosci* 33:10209-10220.

654 Jensen O, Goel P, Kopell N, Pohja M, Hari R, Ermentrout B (2005) On the human sensorimotor-  
655 cortex beta rhythm: sources and modeling. *NeuroImage* 26:347-355.



656 Kilavik BE, Ponce-Alvarez A, Trachel R, Confais J, Takerkart S, Riehle A (2012) Context-  
657 related frequency modulations of macaque motor cortical LFP beta oscillations. *Cereb Cortex*  
658 22:2148-2159.

659 Kitai ST, Kita H (1987) Anatomy and physiology of the subthalamic nucleus: a driving force  
660 of the basal ganglia. In: *The basal ganglia II: structure and function; current concepts* (Carpenter  
661 MB, Jayaraman A, eds), pp. 357-373. New York: Plenum.

662 Klee MR, Offenloch K, Tigges J (1965) Cross-correlation analysis of electroencephalographic  
663 potentials and slow membrane transients. *Science* 147:519-521.

664 Kravitz AV, Freeze BS, Parker PRL, Kay K, Thwin MT, Deisseroth K, Kreitzer AC (2010)  
665 Regulation of parkinsonian motor behaviours by optogenetic control of basal ganglia circuitry.  
666 *Nature* 466:622-626.

667 Kuhn AA, Williams D, Kupsch A, Limousin P, Hariz M, Schneider GH, Yarrow K, and Brown P  
668 (2004) Event-related beta desynchronization in human subthalamic nucleus correlates with motor  
669 performance. *Brain* 127:735-746.

670 Kuhn AA, Kupsch A, Schneider GH, Brown P (2006) Reduction in subthalamic 8-35 Hz os-  
671 cillatory activity correlates with clinical improvement in Parkinson's disease. *Eur J Neurosci*  
672 23:1956-1960.

673 Kumar A, Cardanobile S, Rotter S, and Aersten A (2011) The role of inhibition in generation  
674 and controlling Parkinson's disease oscillations in the basal ganglia. *Front Syst Neurosci* 5:86.

675 Koshimizu Y, Fujiyama F, Nakamura KC, Furuta T, Kaneko T (2013) Quantitative analysis of  
676 axon bouton distribution of subthalamic nucleus neurons in the rat by single neuron visualization  
677 with a viral vector. *J Comp Neurol* 521:2125-2146.

678 Leventhal DK, Gage GJ, Schmidt R, Pettibone JR, Case AC, and Berke JD (2012) Basal ganglia  
679 beta oscillations accompany cue utilization. *Neuron* 73:523-536.

680 Levy R, Ashby P, Hutchison W.D, Lang A.E, Lozano A.M, and Dostrovsky J.O (2002) De-  
681 pendence of subthalamic nucleus oscillations on movement and dopamine in Parkinson's disease.  
682 *Brain* 125:1196-1209.

683 Little S, Pogosyan A, Kuhn AA, and Brown P (2012) band stability over time correlates with  
684 Parkinsonian rigidity and bradykinesia. *Exp Neurol* 236:383-388.

685 MacKay WA, and Mendonca AJ (1995) Field potential oscillatory bursts in parietal cortex  
686 before and during reach. *Brain Res* 704:167-174.

687 Magill PJ, Bolam JP, Bevan MD (2001) Dopamine regulates the impact of the cerebral cortex  
688 on the subthalamic nucleus-globus pallidus network. *Neuroscience* 106:313-330

689 Mallet N, Pogosyan A, Marton LF, Bolam JP, Brown P, Magill PJ (2008) Parkinsonian beta  
690 oscillations in the external globus pallidus and their relationship with subthalamic nucleus activity.  
691 *J Neurosci* 28:14245-14258.

692 Mallet N, Schmidt R, Leventhal D, Chen F, Amer N, Boraud T (2016) Arkypallidal Cells Send  
693 a Stop Signal to Striatum. *Neuron* 89:308-316

694 McCarthy MM, Moore-Kochlacs C, Gu X, Boyden ES, Han X, Kopell N (2011) Striatal origin  
695 of the pathologic beta oscillations in Parkinson's disease. *PNAS* 108:11620-11625.

696 Nevado-Holgado AJ, Mallet N, Magill PJ, Bogacz R (2014) Effective connectivity of the sub-  
697 thalamic nucleus-globus pallidus network during Parkinsonian oscillations. *Journal of physiology*  
698 7:1429-1455.

699 Niedermeyer E, Lopes da Silva F (1998) *Electroencephalography* (4th edition), Williams and  
700 Wilkins, Baltimore.

701 Nunez PL, Srinivasan R (2005) *Electric Fields of the Brain*. Oxford university press, Oxford,  
702 UK.

703 Oldenburg IA, Sabatini BL (2015) Antagonistic but not symmetric regulation of primary motor

- 704 cortex by basal ganglia direct and indirect pathways. *Neuron* 86:1174-1181.
- 705 Parent M, Parent A (2007) The microcircuitry of primate subthalamic nucleus. *Parkinsonism*
- 706 *& Related Disorders* 13:S292-S295.
- 707 Parent A, Hazrati LN (1995) Functional anatomy of the basal ganglia. I. The cortico-basal
- 708 ganglia-thalamo-cortical loop. *Brain Res Rev* 20:91-127
- 709 Pavlides A, Hogan SJ, Bogacz R (2015) Computational models describing possible mechanisms
- 710 for generation of excessive beta oscillations in Parkinson's disease. *PLoS Comput Biol* 11:12.
- 711 Pfurtscheller G, Stancak A. Jr, and Neuper C (1996) Post-movement beta synchronization. A
- 712 correlate of an idling motor area? *Electroencephalogr. Clin Neurophysiol* 98:281-293.
- 713 Pfurtscheller G, Graimann B, Huggins JE, Levine SP, and Schuh LA (2003) Spatiotemporal
- 714 patterns of beta desynchronization and gamma synchronization in corticographic data during self-
- 715 paced movement. *Clin Neurophysiol* 114:1226-1236.
- 716 Plenz D, Kital ST (1999) A basal ganglia pacemaker formed by the subthalamic nucleus and
- 717 external globus pallidus. *Nature* 400:677-682
- 718 Pogosyan A, Gaynor LD, Eusebio A, and Brown P (2009) Boosting cortical activity at Beta-
- 719 band frequencies slows movement in humans. *Curr Biol* 19:1637-1641.
- 720 Raz A, Vaadia E, and Bergman H (2000) Firing patterns and correlations of spontaneous dis-
- 721 charge of pallidal neurons in the normal and the tremulous 1-methyl-4-phenyl- 1,2,3,6-tetrahydropyridine
- 722 vervet model of parkinsonism. *J Neurosci* 20:8559-8571.
- 723 Redgrave P, Rodriguez M, Smith Y, Rodriguez-Oroz MC, Lehericy S, Bergman H, Agid Y,
- 724 DeLong MR, Obeso JA (2010) Goal-directed and habitual control in the basal ganglia: implications
- 725 for Parkinson's disease. *Nat Rev Neurosci* 11:760-772.
- 726 Remple MS, Bradenham CH, Kao CC, Charles PD, Neimat JS, Konard PE (2011) Subthalamic
- 727 nucleus neuronal firing rate increases with Parkinson's disease progression. *Mov Disord* 26:1657-
- 728 1662.
- 729 Roseberry TK, Lee AM, Lalive AL, Wilbrecht L, Bonci A, Kreitzer AC (2016) Cell-type-specific
- 730 control of brainstem locomotor circuits by basal ganglia. *Cell* 164:526-537.
- 731 Sato F, Parent M, Levesque M, and Parent A (2000) Axonal branching pattern of neurons of
- 732 the subthalamic nucleus in primates. *J Comp Neurol* 424:142-152.
- 733 Schmidt R, Leventhal DK, Mallet N, Chen F, Berke JD (2013) Canceling actions involves a
- 734 race between basal ganglia pathways. *Nat Neurosci* 16:1118-1124.
- 735 Shink E, Bevan MD, Bolam JP, Smith Y (1996) The subthalamic nucleus and the external
- 736 pallidum: two tightly interconnected structures that control the output of the basal ganglia in the
- 737 monkey. *Neuroscience* 73:335-357.
- 738 Smith Y, Hazrati LN, Parent A (1990) Efferent projections of the subthalamic nucleus in the
- 739 squirrel monkey as studied by the PHA-L anterograde tracing method. *J Comp Neurol* 294:306-
- 740 323.
- 741 Sochurkova D, Rektor I (2003) Event-related desynchronization/synchronization in the puta-
- 742 men. An SEEG case study. *Exp Brain Res* 149:401-404.
- 743 Swann N, Tandon N, Canolty R, Ellmore TM, McEvoy LK, Dreyer S, DiSano M, and Aron AR
- 744 (2009) Intracranial EEG reveals a time- and frequency-specific role for the right inferior frontal
- 745 gyrus and primary motor cortex in stopping initiated responses. *J Neurosci* 29:12675-12685.
- 746 Szurhaj W, Derambure P, Labyt E, Cassim F, Bourriez JL, Isnard J, Guieu JD, Mauguier F
- 747 (2003) Basic mechanisms of central rhythms reactivity to preparation and execution of a voluntary
- 748 movement: a stereoelectroencephalographic study. *Clin Neurophysiol* 114:107-119.
- 749 Tachibana Y, Iwamuro H, Kita H, Takada M, Nambu A (2011) Subthalamo-pallidal interactions
- 750 underlying parkinsonian neuronal oscillations in the primate basal ganglia. *Eur J Neurosci* 34:1470-
- 751 1484.

- 752 Tan H, Jenkinson N, Brown P (2014) Dynamic neural correlates of motor error monitoring and  
753 adaptation during trial-to-trial learning. *J Neurosci* 34:5678-5688.
- 754 Terman D, Rubin JE, Yew AC, and Wilson CJ (2002) Activity patterns in a model for the  
755 subthalamopallidal network of the basal ganglia. *J Neurosci* 22:2963-2976.
- 756 Wei W, Rubin JE, Wang XJ (2015) Role of the Indirect Pathway of the Basal Ganglia in  
757 Perceptual Decision Making. *J Neurosci* 35:4052-4064.
- 758 Wessel JR, Aron AR (2017) On the Globality of Motor Suppression: Unexpected Events and  
759 Their Influence on Behavior and Cognition. *Neuron* 93:259-280.

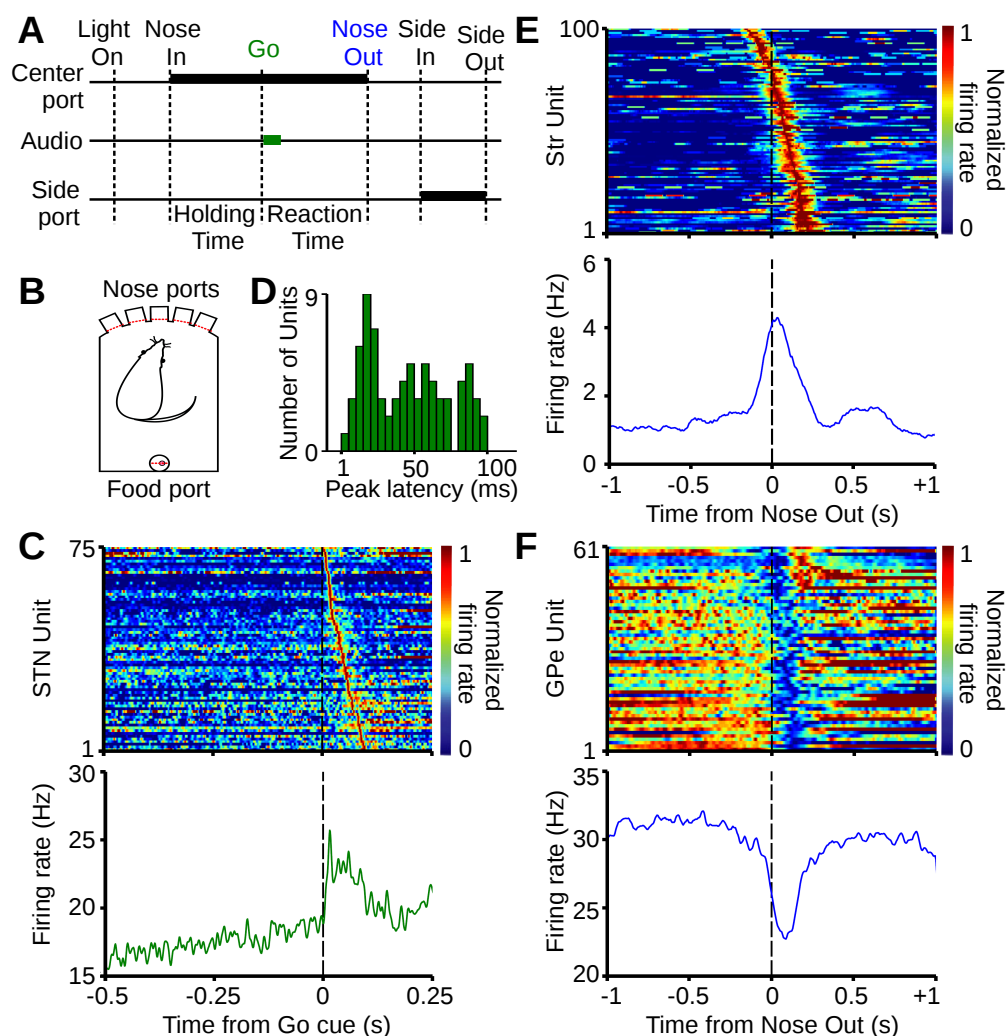

Figure 1: Single unit responses to sensory and motor events during performance of the behavioral task. **A**, Sequence of behavioral events during the experiment. Thick black bars show the position of the animal and thick green bar shows the occurrence of the sensory cue. Holding time refers to a random time delay (500 to 1200 ms) in which the animal waits in one of the three central ports for the sensory cue. Reaction time is measured as the time between the onset of the Go cue and movement initiation (Nose Out). **B**, Scheme of the operant chamber with five nose ports in front and a food port in the back. **C** (top) Normalized mean firing rates of single STN units responding to the Go cue with an increase in firing rate (sorted by peak latency; each row shows activity of one unit). Bottom, corresponding mean firing rate of the STN subpopulation. **D**, Distribution of peak latencies relative to the time of Go cue for STN neurons shown in C. **E** (top) Normalized firing rates of single units in the striatum (putative MSNs) increasing their activity around movement onset (sorted by time of peak activity). Bottom, corresponding mean firing rate of the subpopulation. **F**, Same as E, for GPe subpopulation decreasing activity around movement onset.

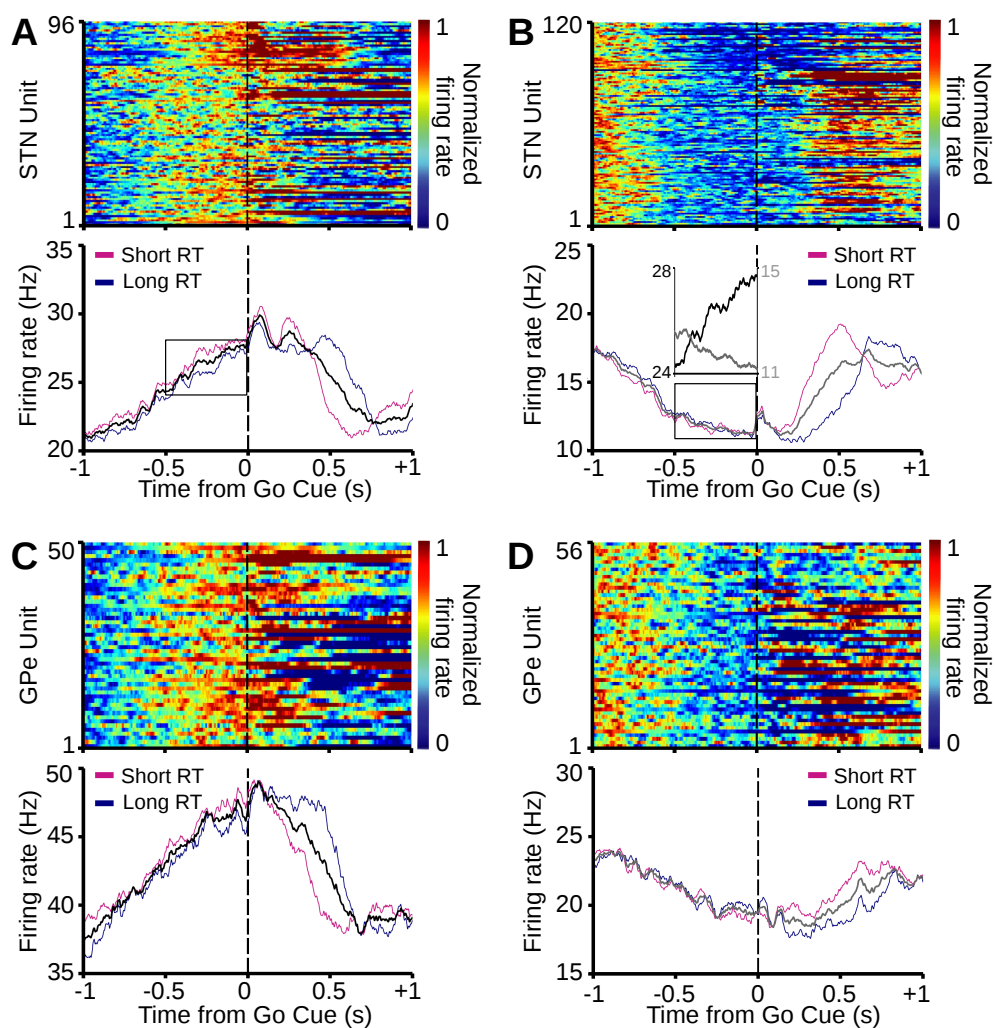

Figure 2: Ramping activity in STN and GPe while the animal is waiting for the Go cue. **A** (top) Normalized mean firing rate of single STN units with a positive ramp in firing rate before the Go cue. Bottom, corresponding mean firing rate of the STN subpopulation in all trials (black) and subsets of long (cyan) and short (magenta) reaction time trials. **B**, Same as A, for single STN units with a negative ramp in their firing rate before the Go cue. Inset, direct comparison between average firing rates of neurons in A, and B, corresponding to the areas inside the black rectangles. **C**, **D**, Similar to A and B, respectively, for GPe units.

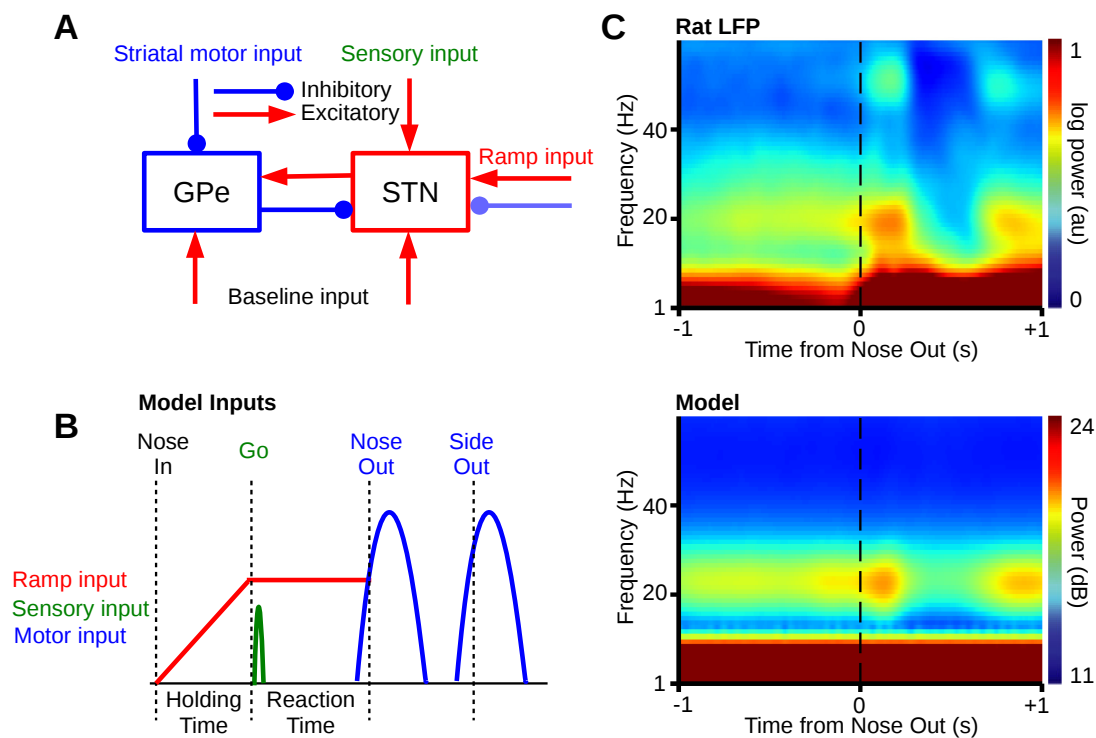

Figure 3: Computational model of beta oscillations stimulated with biologically realistic input patterns. **A**, Scheme of the STN-GPe spiking neuronal network model. Motor input is provided as striatal inhibitory input to the GPe whereas sensory input is provided as excitatory input to the STN. Brake input comprises separate excitatory and inhibitory inputs to separate STN subpopulations (see Methods). **B**, Schematized temporal sequence of inputs to the network model during simulation of the behavioral task. **C** (top) Mean spectrogram of GPe LFP data showing modulation of LFP beta power during movement initiation. Bottom, Mean spectrogram (over 400 simulations) of GPe average firing rates for simulation of correct Go trials in the network model matching the time course of beta power in the experimental data.

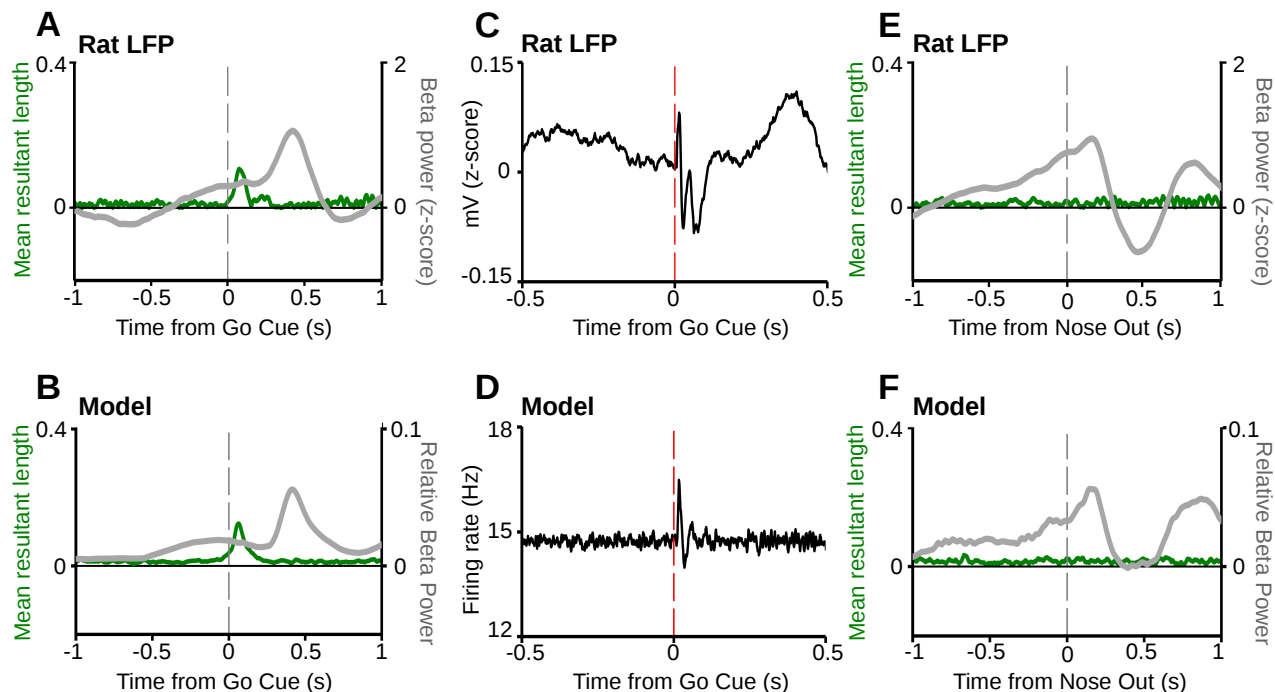

Figure 4: Sensory cues lead to a beta phase reset in both experimental data and in the network model. **A, B**, Time resolved beta mean resultant length (left axes, green) and beta power (right axes, gray) of GPe LFP data during correctly performed contralateral go trials averaged across all rats (**A**) and of the network model GPe population firing rate (**B**; average of 400 simulations). Note that sensory input is associated with a phase reset in both experimental data and in the model, shown as a brief increase in the value of the mean resultant length after the Go cue. **C**, Mean of the raw experimental STN LFP data, over all correctly performed contralateral go trials, aligned to the Go cue. **D**, Mean of the STN population firing rates in response to the Go cue in the network model (average of 400 simulations). **E, F**, The same analysis and simulations as in **A** and **B**, respectively, but aligned to movement onset. Note that the phase distribution is random during initiation and execution of movement in both the rat and the network model (no increase in the mean resultant length around movement onset).

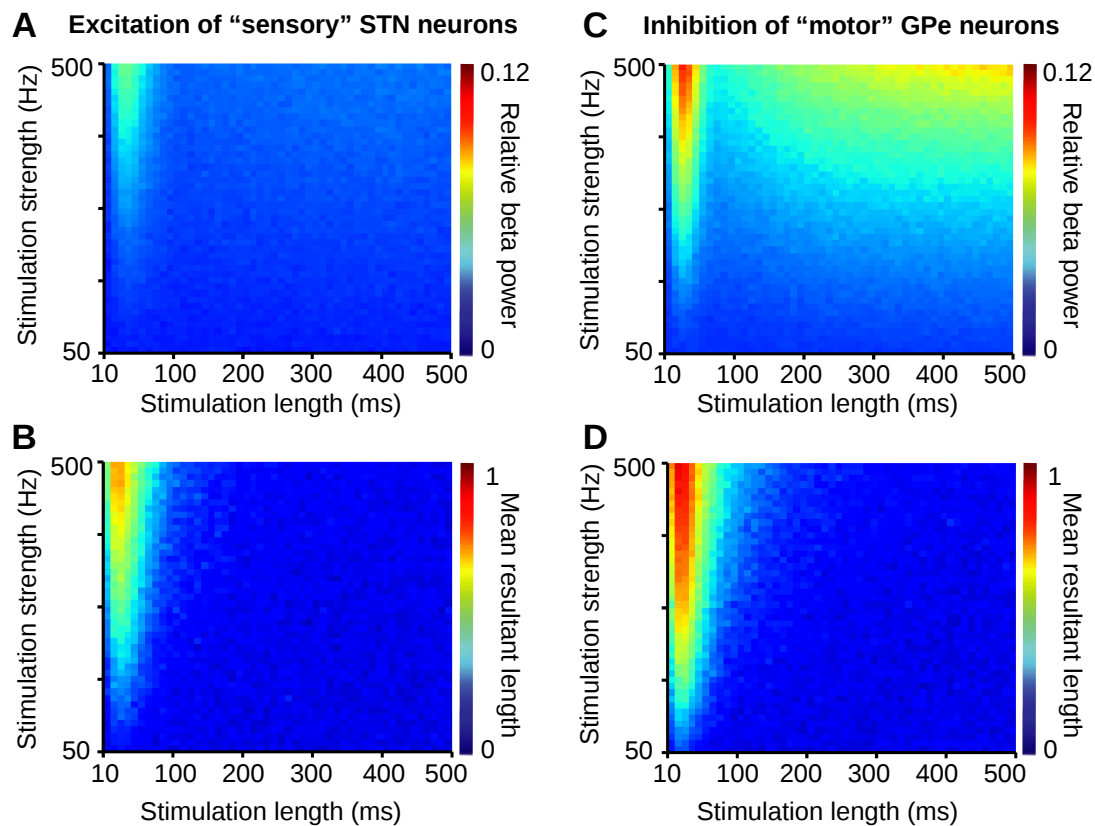

Figure 5: Effect of stimulation duration on beta power and phase reset in the network model. **A, B**, Relative beta power (A) and beta phase reset (B; measured by the mean resultant length) in the model GPe caused by excitatory input to the 27% "sensory" STN neurons of varying duration (x-axis) and strength (y-axis). **C, D**, Relative beta power (C) and phase reset (D) in the model GPe caused by inhibitory input to the 40% "motor" GPe neurons (see Methods) of varying duration (x-axis) and strength (y-axis). Note that in all panels we measure beta oscillations based on the GPe population firing rate.



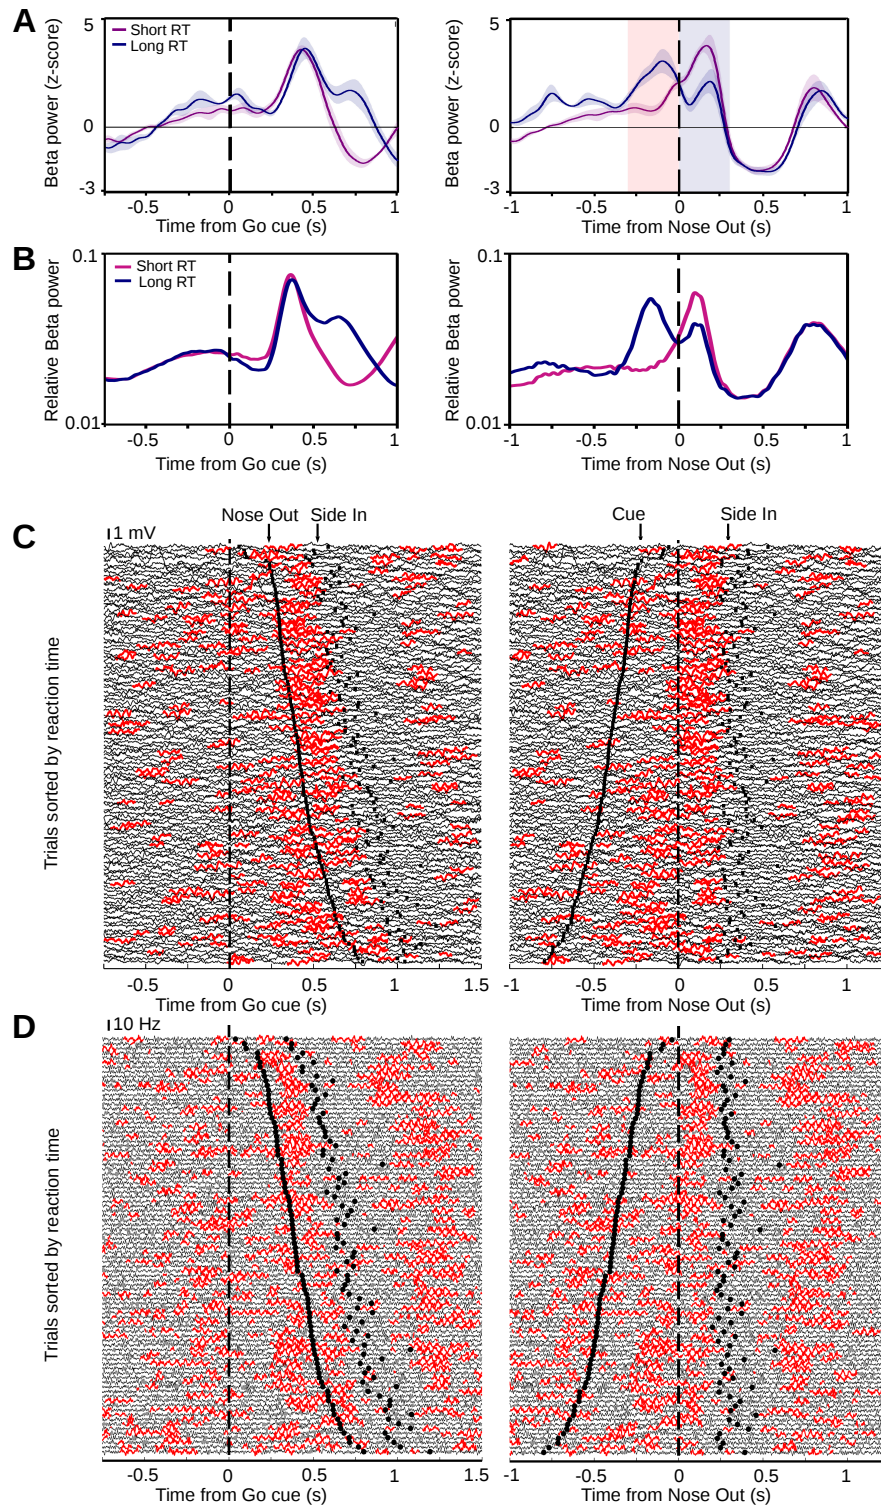

Figure 6: Relationship between beta oscillations and reaction time. **A**, Mean beta power of striatal LFP data for short (<500 ms) and long (>500 ms) reaction time trials aligned to the Go cue (left) and movement onset (right), averaged across rats (adapted from Leventhal et al., 2012, with permission from Elsevier). **B**, Mean relative beta power of GPe population firing rates in the network model aligned to the Go cue (left), and movement onset (right), averaged across 400 simulations. **C**, Single-trial striatal LFP traces from a single recording session, sorted by reaction time, aligned to the Go cue (left) and movement onset (right) with beta epochs marked in red (adapted from Leventhal et al., 2012, with permission from Elsevier). **D**, Same visualization for single-trial model simulations with each trace showing the population firing rate of GPe neurons in the network model. For simulation of each trial, the model reaction time was randomly selected from the experimental data.

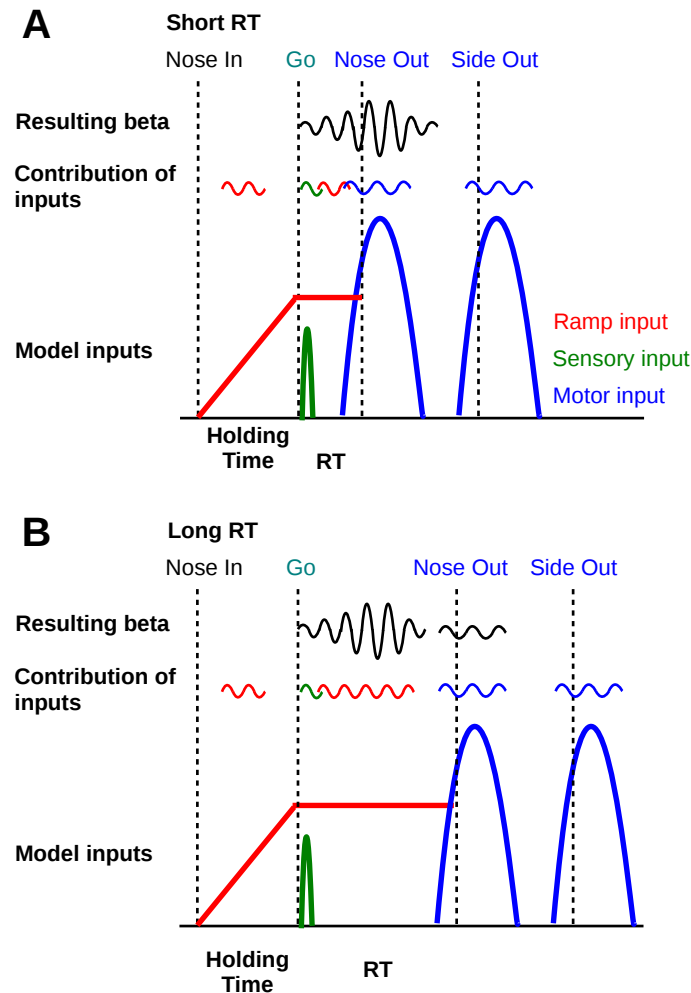

Figure 7: Scheme of contribution of each stimulation component to the generation of beta oscillations in short (A), and long (B) reaction time trials. Red, green, and blue schematized beta oscillations show the contribution of each individual input (ramp, sensory, and motor inputs, respectively) without the other one. Note that for short reaction time trials, interaction between beta oscillations due to ramp, sensory, and motor inputs leads to transient increase in beta power around the time of movement onset (black trace shows the net effect of the interaction). For long reaction time trials, interaction between beta oscillations due to sensory and ramp inputs leads to transient increase in beta power before the time of movement onset which is followed by another beta epoch due to motor input (black traces show the net effect of the interaction).

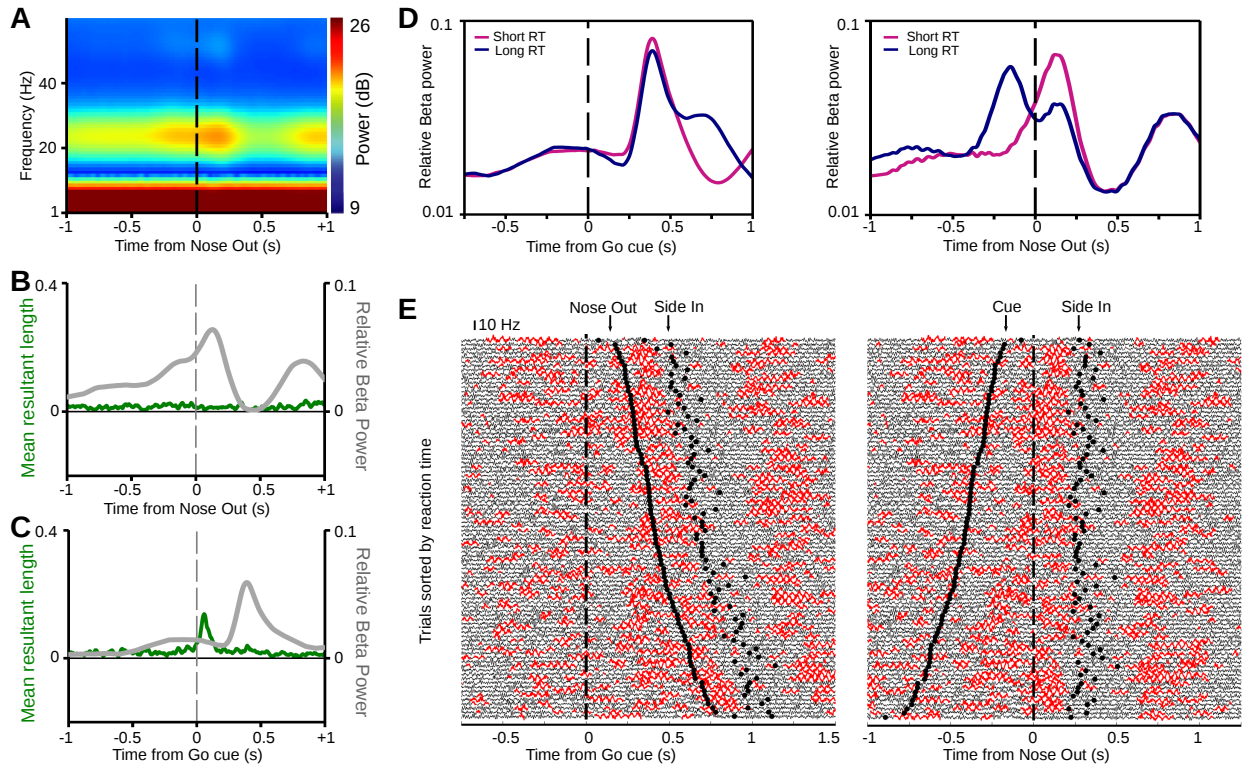

Figure 8: The network model without recurrent connections in STN reproduces all key results. **A**, Mean spectrogram (over 400 simulations) of GPe average firing rates for simulation of correct Go trials in the modified network model matching the time course of beta power in the experimental data. **B**, **C**, Time resolved beta mean resultant length (left axes, green) and beta power (right axes, gray) of the GPe population firing rate in the modified network model, aligned to the movement onset (**B**) and to the Go cue (**C**; average of 400 simulations). **D**, Mean relative beta power of GPe population firing rates in the modified network model aligned to the Go cue (left), and movement onset (right), averaged across 400 simulations. **E**, Single-trial simulations of the modified network model, sorted by reaction time, with each trace showing the population firing rate of GPe neurons, aligned to the Go cue (left) and movement onset (right; beta epochs are marked in red).
